# Supplementary material for: Vibrational and electronic structure of the dinuclear bis(µ-nitrido) vanadium(v) complex [V(N{N″}2)(µ-N)]2: spectroscopic properties of the M2(µ-N)2diamond core
Source: Royal Society of Chemistry journal article supplement (doi:10.1039/b418856j), 2005-01-01
Supplement: b418856j.pdf [file b418856j.pdf]

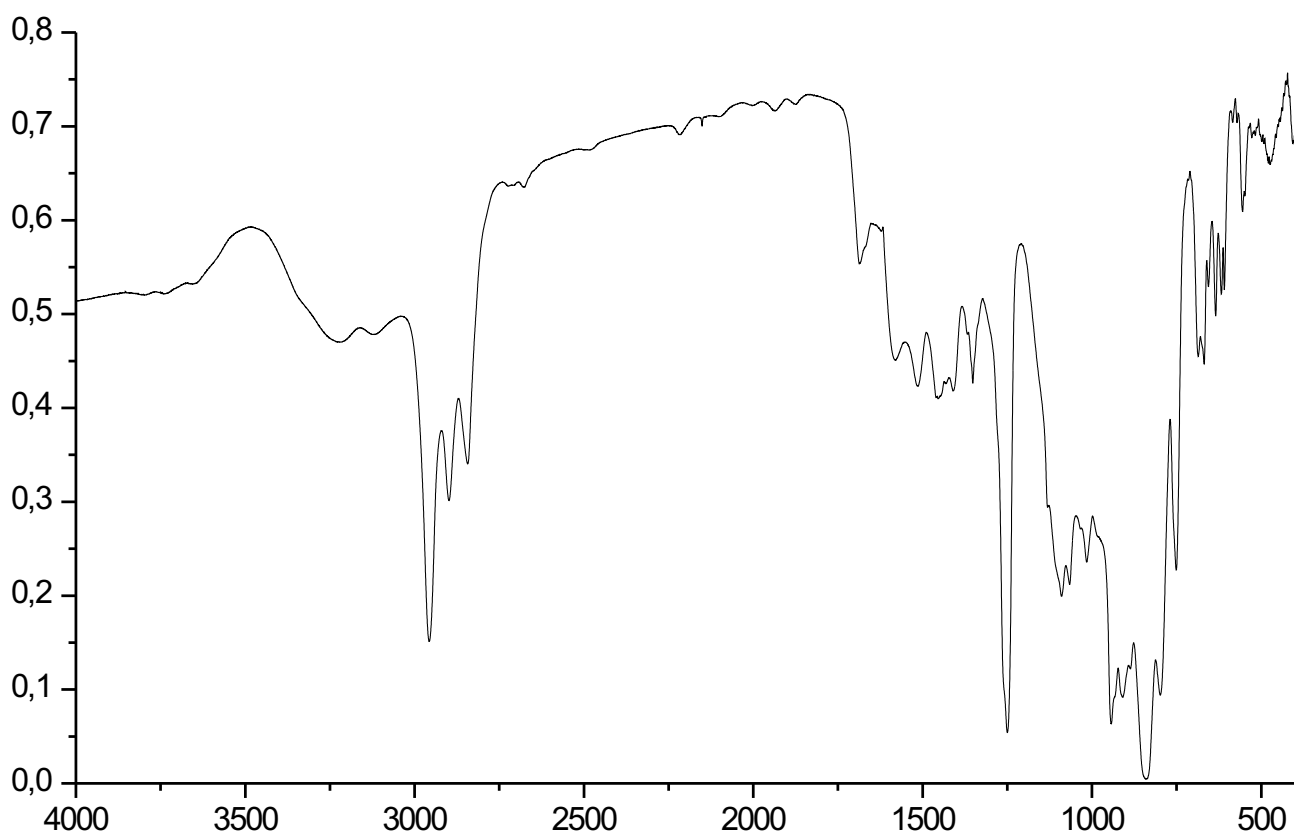

Supp. Mat. Figure S1. MIR spectra of 1.

**Supp. Mat.****Table S1.** Charge contributions of model I.<sup>a</sup>

| Orbital                          | Label | Energy [Hartree] | Charge decomposition [%] <sup>b</sup> |    |                              |                              |
|----------------------------------|-------|------------------|---------------------------------------|----|------------------------------|------------------------------|
|                                  |       |                  | V-d                                   | N  | N <sub>AD</sub> <sup>c</sup> | N <sub>AM</sub> <sup>d</sup> |
| d <sub>z2</sub>                  | 169   | -0.04625         | 61                                    | 1  | 11                           | 0                            |
| d <sub>x2-y2-py</sub>            | 168   | -0.05598         | 62                                    | 10 | 8                            | 1                            |
| d <sub>yz</sub>                  | 167   | -0.07935         | 70                                    | 2  | 11                           | 0                            |
| N <sub>AM</sub>                  | 166   | -0.19597         | 5                                     | 8  | 11                           | 36                           |
| N <sub>AD-pz</sub>               | 165   | -0.19989         | 2                                     | 10 | 36                           | 13                           |
| N <sub>AM-pz</sub>               | 164   | -0.21017         | 3                                     | 5  | 16                           | 37                           |
| N <sub>AD-dyz-py</sub>           | 163   | -0.21708         | 8                                     | 5  | 33                           | 20                           |
| N <sub>AD</sub>                  | 162   | -0.22056         | 2                                     | 5  | 48                           | 8                            |
| N <sub>AD-dx2-y2-pyz</sub>       | 161   | -0.22363         | 12                                    | 7  | 45                           | 1                            |
| py-d <sub>xy</sub>               | 160   | -0.25720         | 24                                    | 40 | 13                           | 1                            |
| N <sub>AD-pz</sub>               | 159   | -0.26146         | 7                                     | 26 | 33                           | 1                            |
| pz-d <sub>yz</sub>               | 158   | -0.26514         | 30                                    | 38 | 11                           | 0                            |
| px-d <sub>σ</sub>                | 150   | -0.29833         | 11                                    | 13 | 5                            | 1                            |
| p <sub>xy</sub> -d <sub>xy</sub> | 147   | -0.30156         | 13                                    | 17 | 7                            | 1                            |
| p <sub>xy</sub> -d <sub>xy</sub> | 143   | -0.30722         | 9                                     | 9  | 10                           | 2                            |
| px-d <sub>σ</sub>                | 142   | -0.30790         | 17                                    | 18 | 11                           | 4                            |
| p <sub>xy</sub> -d <sub>xy</sub> | 141   | -0.31046         | 21                                    | 22 | 15                           | 3                            |
| p <sub>xy</sub> -d <sub>xy</sub> | 140   | -0.31859         | 24                                    | 29 | 5                            | 9                            |
| py-d <sub>x2-y2</sub>            | 138   | -0.32492         | 9                                     | 9  | 12                           | 20                           |
| dxz-pz                           | 137   | -0.32495         | 18                                    | 9  | 17                           | 12                           |

[a] Only selected orbitals are listed. [b] The charge decomposition gives the sum of all contributions of the corresponding atoms. [c] N<sub>AD</sub> are the nitrogen atoms of the amido groups. [d] N<sub>AM</sub> are the nitrogen atoms of the amino groups.
